# Supplementary material
Source: publisher figshare collection journal article supplement (https://acs.figshare.com/ndownloader/files/4521094)

## Supporting Information

### Intracellular biogenic silver nanoparticles for the generation of carbon supported sustained bactericidal agents

P. S. Vijayakumar and B. L. V. Prasad\*

**Fig. S1.** The photos of bactericidal kinetics activity of **Sample 2** compared to control and **Sample 1**.

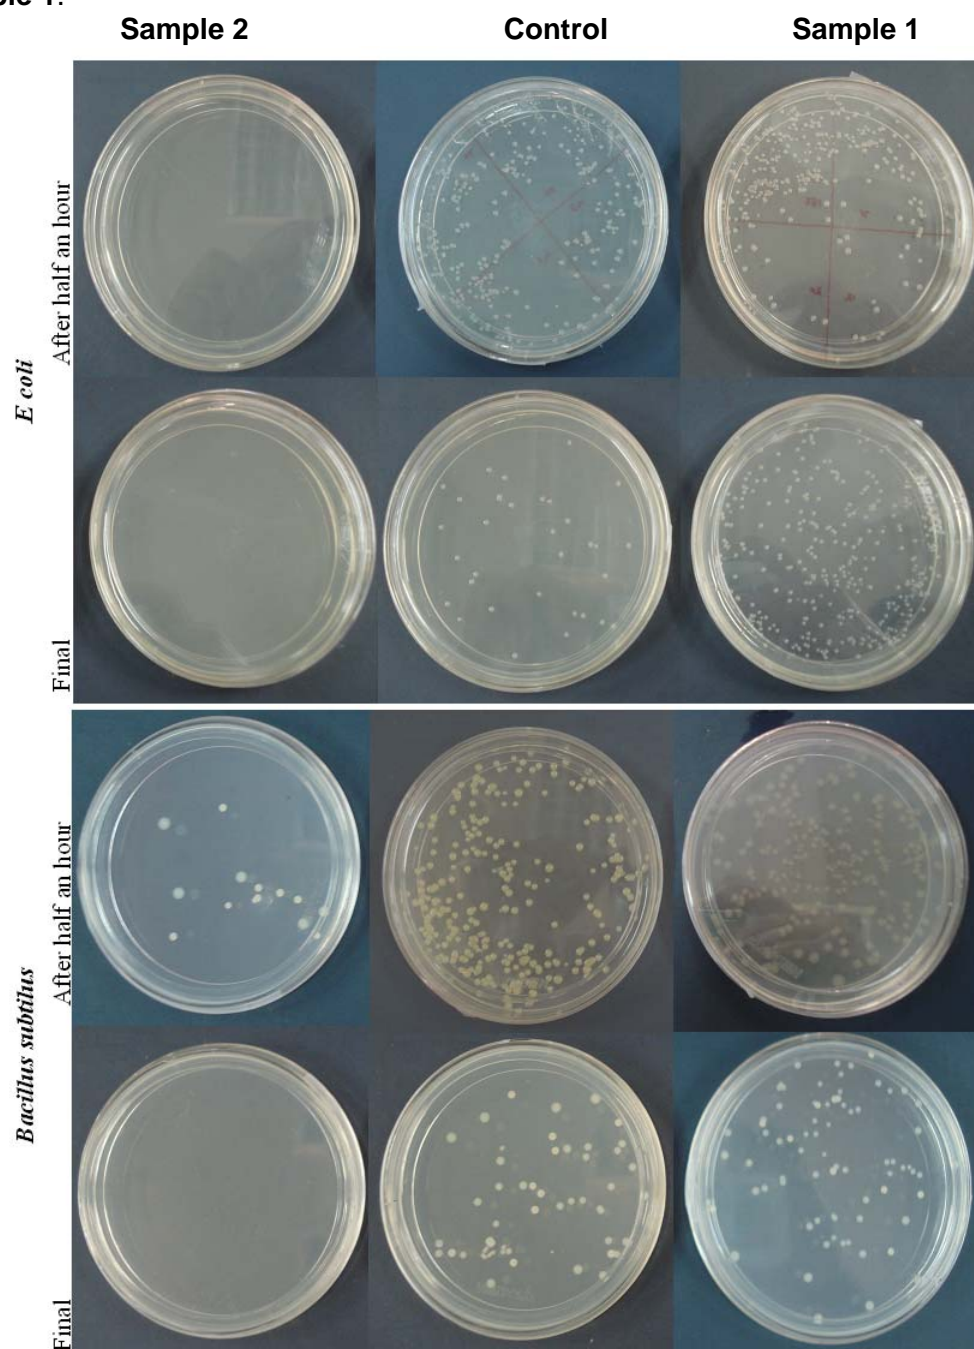

**Fig. S2.** The UV visible absorbance intensity of silver nanoparticles released on 5 min pulse sonication to **Sample 2, 4 and 5**. Curve 1, 2 and 3 indicates the supernatant absorbance after first, second and third sonication of the respective samples.

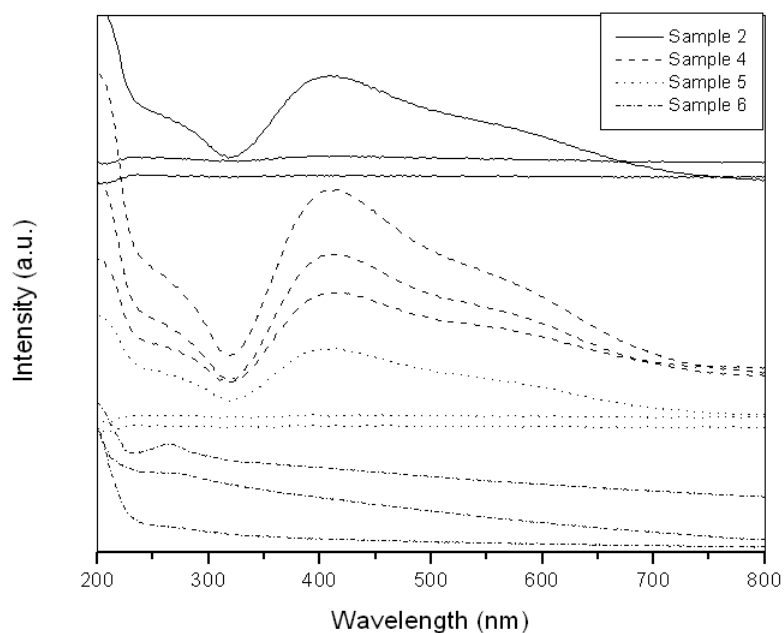

Note: The absorbance was insignificant before the sonication and hence not given here.

The absorbance values are vertically shifted for the sample alignment.

**Table S1.** The silver concentration of the supernatant released from **Sample 2, 4 and 5** on 5 min sonication in ppm.

|                   | <b>Sample 2</b> | <b>Sample 4</b> | <b>Sample 5</b> | <b>Sample 6</b> |
|-------------------|-----------------|-----------------|-----------------|-----------------|
| First sonication  | 35              | 66              | 19              | 18              |
| Second sonication | 1               | 63              | 1               | 2               |
| Third sonication  | 1               | 50              | 1               | 2               |

**Fig. S3.** The photos of anti viral kinetics activity of **Sample 2** compared to control and **Sample 1**.

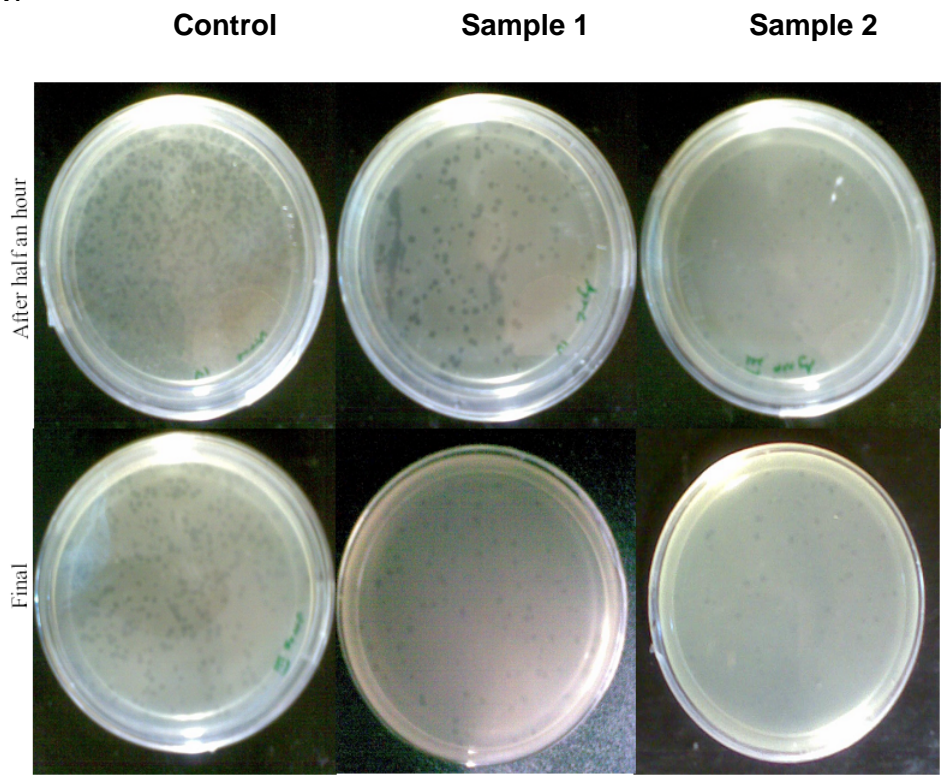

Supplement: Supplementary file 1 [file 4521094]
